# Supplementary material for: Evaluation of the Anticancer and Biological Activities of Istaroxime via Ex Vivo Analyses, Molecular Docking and Conceptual Density Functional Theory Computations
Source: MDPI journal article supplement (doi:10.3390/molecules28227458), 2023-11-07
Supplement: s1 [file s1]

# **Evaluation of the Anticancer and Biological Activities of Istaroxime via Ex Vivo Analyses, Molecular Docking and Conceptual Density Functional Theory Computations**

**Ege Gok <sup>1</sup>, Naz Unal <sup>2</sup>, Burcin Gungor <sup>2</sup>, Gulderen Karakus <sup>3</sup>, Savas Kaya <sup>4,\*</sup>, Pakize Canturk <sup>1,\*</sup> and Konstantin P. Katin <sup>5</sup>**

\* Correspondence: savaskaya@cumhuriyet.edu.tr (S.K.); pcanturk@cumhuriyet.edu.tr (P.C.)

**SUPPLEMENTARY MATERIALS**

**Table S1.** Atomic coordinates (Å) of the Istaroxime molecule, optimized in DMSO solvent at the B3LYP/6-311G\*\* level of theory.

|   |          |          |          |
|---|----------|----------|----------|
| C | 1.71826  | -7.11401 | -0.29016 |
| C | 0.54426  | -8.08202 | -0.08940 |
| C | 0.35825  | -8.34696 | 1.39307  |
| C | 1.76558  | -8.15760 | 1.97441  |
| C | 2.43614  | -7.06200 | 1.09573  |
| C | 4.62608  | -6.44559 | -0.13138 |
| C | 3.91035  | -6.69870 | -1.49643 |
| C | 2.67703  | -7.60797 | -1.38705 |
| C | 3.97135  | -7.22703 | 1.02696  |
| C | 6.81145  | -6.55168 | 1.19198  |
| C | 6.17220  | -6.69601 | -0.19554 |
| C | 4.59128  | -6.80810 | 2.36665  |
| C | 6.07829  | -6.62591 | 2.31671  |
| C | 8.84697  | -5.42595 | 0.21772  |
| C | 8.31693  | -5.57894 | -1.17972 |
| C | 6.77643  | -5.62227 | -1.14459 |
| C | 8.32786  | -6.41898 | 1.23065  |
| N | 9.66997  | -4.54126 | 0.65092  |
| O | 10.13806 | -3.67853 | -0.36638 |
| C | 11.02080 | -2.70293 | 0.20698  |
| C | 11.46941 | -1.77962 | -0.92050 |
| N | 10.40710 | -0.99250 | -1.56325 |
| O | 6.57758  | -6.53988 | 3.59915  |
| O | -0.13427 | -8.55053 | -0.99005 |
| H | 4.50834  | -5.38082 | 0.11890  |
| H | 7.53973  | -6.42781 | 3.59397  |
| C | 6.50192  | -8.11618 | -0.72978 |
| H | 4.18256  | -8.29440 | 0.87751  |
| H | 2.22440  | -6.08229 | 1.54430  |
| C | 1.10374  | -5.74570 | -0.66674 |
| H | 2.99230  | -8.63538 | -1.16175 |
| H | 2.15025  | -7.64956 | -2.34647 |
| H | 1.87245  | -4.96697 | -0.69159 |
| H | 0.62384  | -5.79068 | -1.65047 |
| H | 0.35062  | -5.43286 | 0.06626  |
| H | -0.33158 | -7.57956 | 1.77618  |
| H | -0.09946 | -9.32277 | 1.57829  |
| H | 1.75365  | -7.89086 | 3.03485  |
| H | 2.32549  | -9.09814 | 1.88394  |
| H | 3.61338  | -5.74033 | -1.93469 |
| H | 4.59233  | -7.14636 | -2.22334 |
| H | 4.14189  | -5.86268 | 2.70765  |
| H | 4.36138  | -7.54722 | 3.14440  |
| H | 8.71229  | -6.12777 | 2.21405  |
| H | 8.78949  | -7.39422 | 1.00611  |
| H | 6.41018  | -5.78156 | -2.16477 |
| H | 6.41358  | -4.63555 | -0.82893 |
| H | 7.57310  | -8.32952 | -0.67082 |
| H | 5.99475  | -8.88664 | -0.14123 |
| H | 6.21515  | -8.24355 | -1.77845 |
| H | 8.65931  | -4.76388 | -1.81909 |
| H | 8.71374  | -6.51233 | -1.60213 |
| H | 10.49068 | -2.13986 | 0.98867  |
| H | 11.88551 | -3.20615 | 0.66205  |
| H | 12.22035 | -1.09200 | -0.51361 |
| H | 11.96824 | -2.37792 | -1.69331 |
| H | 9.68560  | -1.61319 | -1.92742 |
| H | 9.94663  | -0.38916 | -0.88302 |

**Table S2.** Vibrational frequencies (cm<sup>-1</sup>) of the Istaroxime molecule, calculated in the DMSO solvent at the B3LYP/6-311G\*\* level of theory.

| # of mode | frequency | # of mode | frequency | # of mode | frequency |
|-----------|-----------|-----------|-----------|-----------|-----------|
| 1         | 24.44     | 57        | 889.00    | 113       | 1390.90   |
| 2         | 48.81     | 58        | 893.79    | 114       | 1395.88   |
| 3         | 50.94     | 59        | 920.09    | 115       | 1398.64   |
| 4         | 58.24     | 60        | 921.33    | 116       | 1403.06   |
| 5         | 64.10     | 61        | 936.75    | 117       | 1404.42   |
| 6         | 75.03     | 62        | 945.57    | 118       | 1414.76   |
| 7         | 100.68    | 63        | 952.47    | 119       | 1439.91   |
| 8         | 116.49    | 64        | 962.83    | 120       | 1459.96   |
| 9         | 126.45    | 65        | 973.92    | 121       | 1461.91   |
| 10        | 139.22    | 66        | 981.39    | 122       | 1468.40   |
| 11        | 151.29    | 67        | 988.89    | 123       | 1470.48   |
| 12        | 168.43    | 68        | 1006.01   | 124       | 1472.55   |
| 13        | 173.19    | 69        | 1014.28   | 125       | 1480.34   |
| 14        | 198.63    | 70        | 1019.75   | 126       | 1486.61   |
| 15        | 212.01    | 71        | 1030.74   | 127       | 1487.53   |
| 16        | 224.57    | 72        | 1039.33   | 128       | 1490.03   |
| 17        | 230.90    | 73        | 1042.45   | 129       | 1494.29   |
| 18        | 239.52    | 74        | 1057.09   | 130       | 1496.03   |
| 19        | 253.30    | 75        | 1074.81   | 131       | 1500.92   |
| 20        | 263.32    | 76        | 1078.47   | 132       | 1507.58   |
| 21        | 285.00    | 77        | 1087.00   | 133       | 1642.08   |
| 22        | 295.39    | 78        | 1092.53   | 134       | 1702.03   |
| 23        | 307.68    | 79        | 1099.18   | 135       | 1723.90   |
| 24        | 321.91    | 80        | 1120.89   | 136       | 1773.42   |
| 25        | 331.39    | 81        | 1128.60   | 137       | 2974.64   |
| 26        | 346.58    | 82        | 1136.85   | 138       | 2984.18   |
| 27        | 351.90    | 83        | 1145.44   | 139       | 2990.21   |
| 28        | 356.90    | 84        | 1166.38   | 140       | 2995.13   |
| 29        | 370.43    | 85        | 1175.64   | 141       | 3006.36   |
| 30        | 396.03    | 86        | 1186.23   | 142       | 3009.08   |
| 31        | 409.25    | 87        | 1198.69   | 143       | 3014.16   |
| 32        | 417.29    | 88        | 1204.31   | 144       | 3015.46   |
| 33        | 433.20    | 89        | 1210.41   | 145       | 3018.77   |
| 34        | 467.79    | 90        | 1221.01   | 146       | 3020.48   |
| 35        | 473.62    | 91        | 1229.06   | 147       | 3021.27   |
| 36        | 500.73    | 92        | 1237.10   | 148       | 3022.47   |
| 37        | 507.81    | 93        | 1239.34   | 149       | 3024.65   |
| 38        | 525.33    | 94        | 1256.29   | 150       | 3031.05   |
| 39        | 535.07    | 95        | 1265.24   | 151       | 3036.55   |
| 40        | 549.24    | 96        | 1267.14   | 152       | 3042.21   |
| 41        | 575.72    | 97        | 1273.25   | 153       | 3045.38   |
| 42        | 588.59    | 98        | 1280.95   | 154       | 3058.16   |
| 43        | 611.63    | 99        | 1302.73   | 155       | 3064.36   |
| 44        | 623.51    | 100       | 1307.60   | 156       | 3066.62   |
| 45        | 645.24    | 101       | 1314.93   | 157       | 3069.77   |
| 46        | 662.71    | 102       | 1324.41   | 158       | 3080.66   |
| 47        | 687.92    | 103       | 1333.79   | 159       | 3084.65   |
| 48        | 716.42    | 104       | 1337.12   | 160       | 3088.08   |
| 49        | 736.51    | 105       | 1342.76   | 161       | 3093.32   |
| 50        | 776.65    | 106       | 1349.74   | 162       | 3095.15   |
| 51        | 812.39    | 107       | 1354.27   | 163       | 3098.65   |
| 52        | 821.01    | 108       | 1367.34   | 164       | 3115.89   |
| 53        | 828.03    | 109       | 1372.82   | 165       | 3118.81   |
| 54        | 835.77    | 110       | 1377.53   | 166       | 3472.82   |
| 55        | 874.38    | 111       | 1384.60   | 167       | 3543.60   |
| 56        | 881.13    | 112       | 1388.24   | 168       | 3792.47   |
